# Supplementary material for: FMR1 Epigenetic Silencing Commonly Occurs in Undifferentiated Fragile X-Affected Embryonic Stem Cells
Source: PubMed Central journal article supplement — Stem Cell Reports. 2014 Oct 3;3(5):699–706. doi: 10.1016/j.stemcr.2014.09.001 (PMC4235235; doi:10.1016/j.stemcr.2014.09.001), 2014-10-03
Supplement: mmc1.pdf [file mmc1.pdf]

Stem Cell Reports, Volume 3

Supplemental Information

***FMR1* Epigenetic Silencing Commonly Occurs in  
Undifferentiated Fragile X-Affected Embryonic Stem Cells**

Michal Avitzour, Hagar Mor-Shaked, Shira Yanovsky-Dagan, Shira Aharoni, Gheona  
Altarescu, Paul Renbaum, Talia Eldar-Geva, Oshrat Schonberger, Ephrat Levy-Lahad,  
Silvina Epsztejn-Litman, and Rachel Eiges

# Fig. S1

**A**

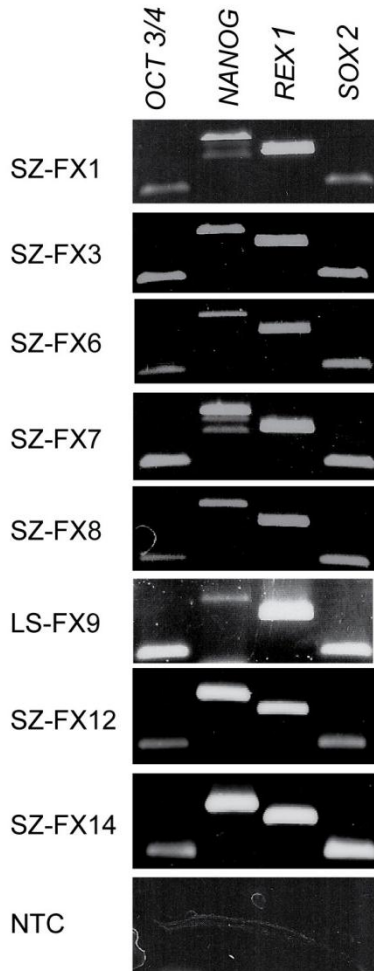

**B**

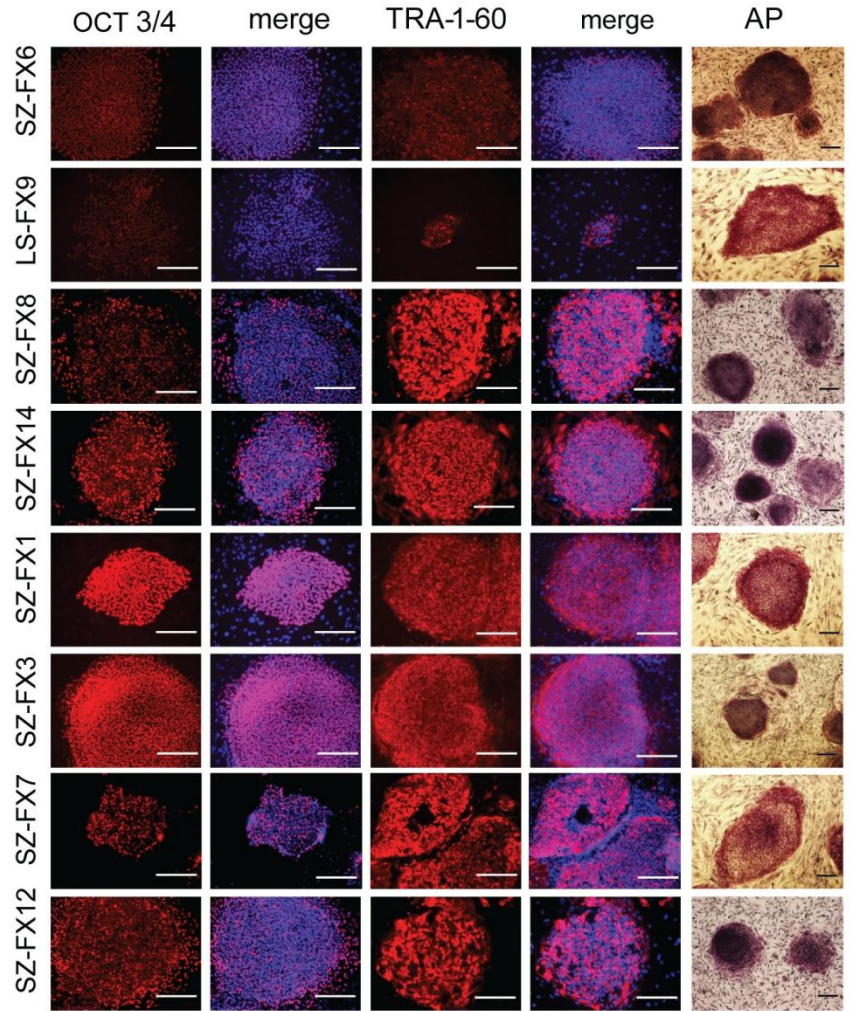

**C**

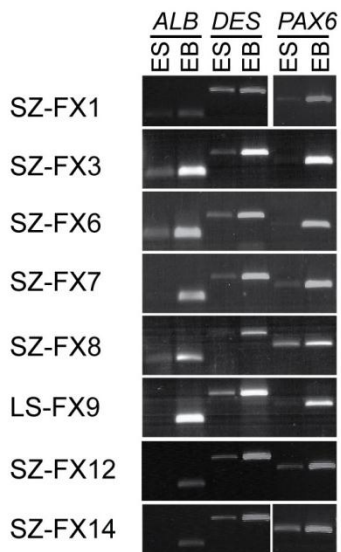

**D**

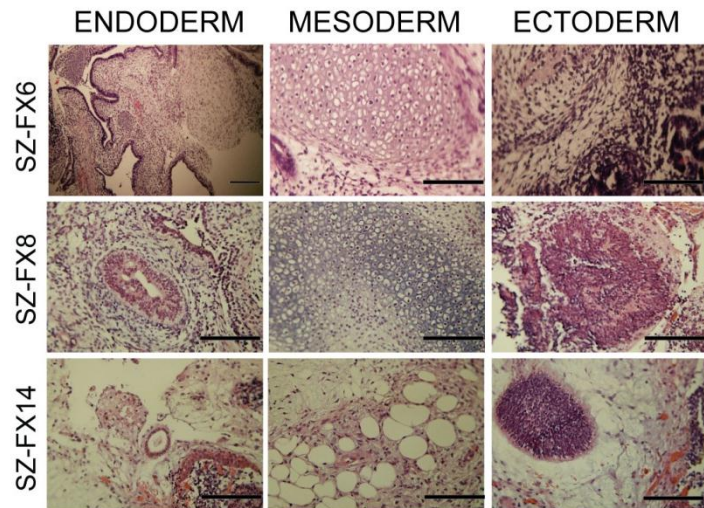

# Fig. S2

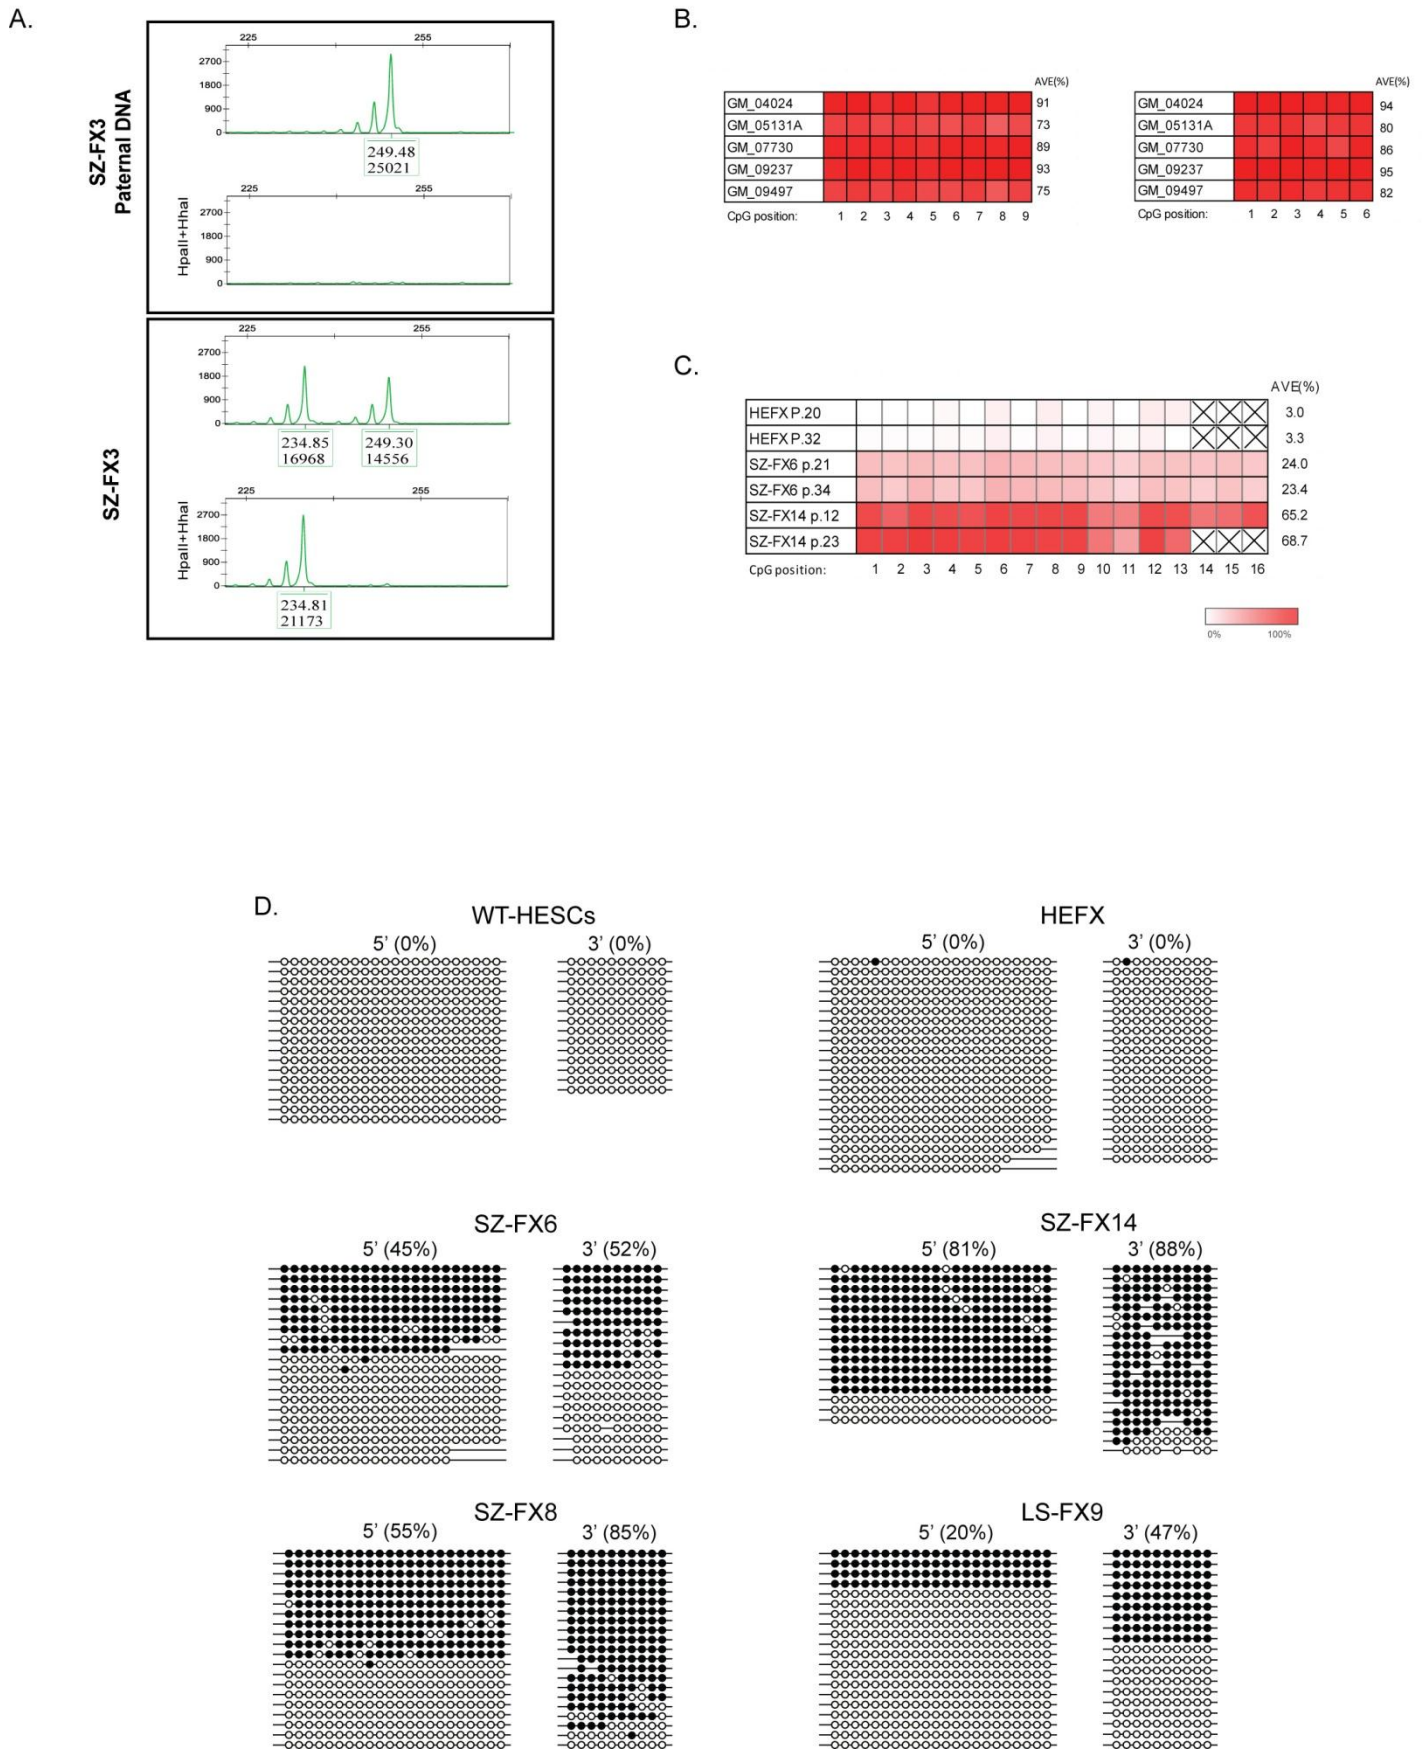

# Fig. S3

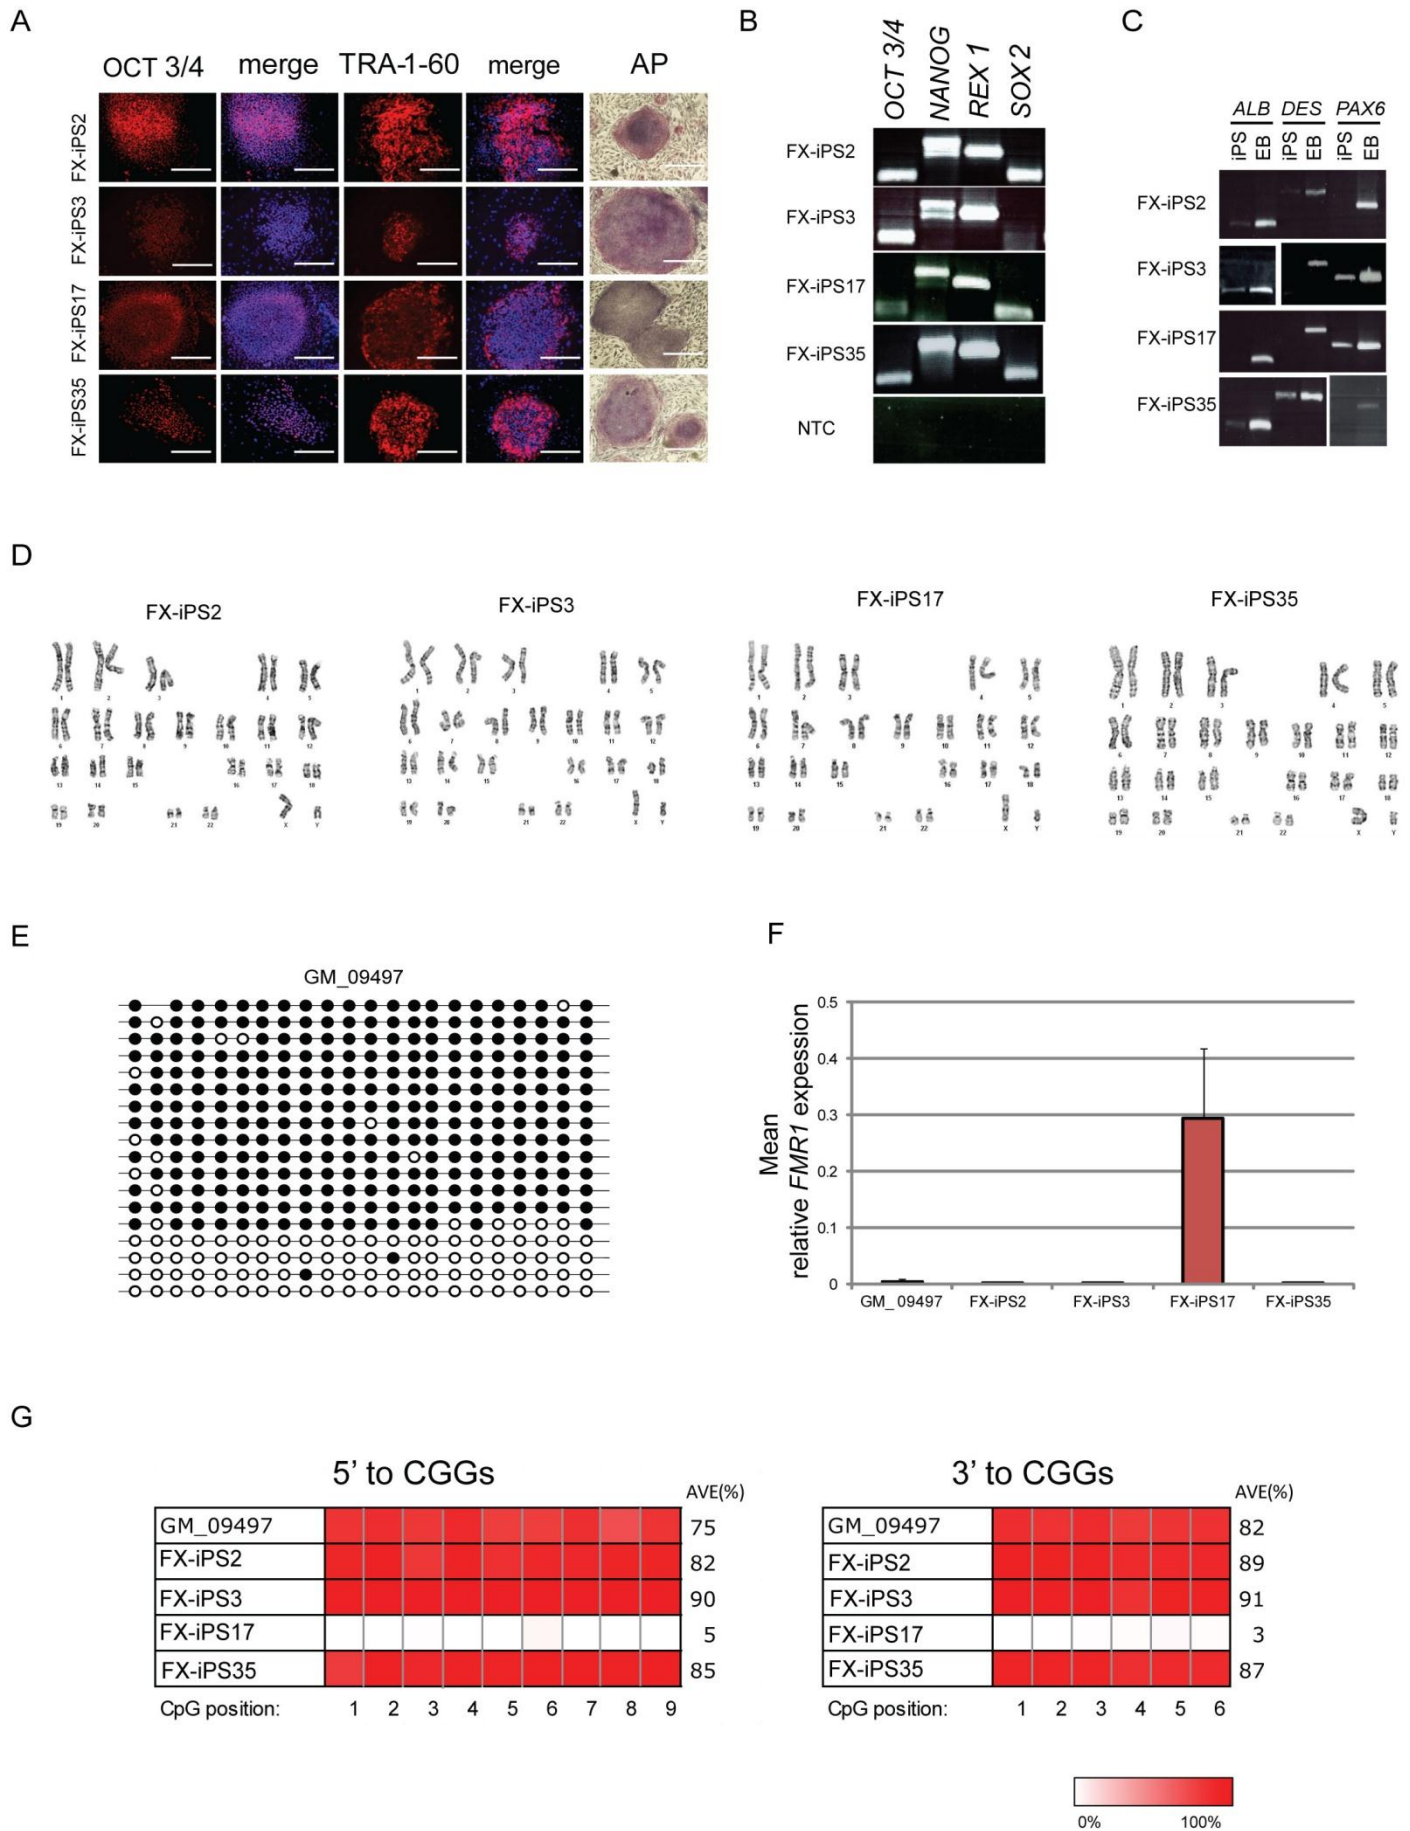

## **FIGURE LEGENDS**

### **Fig. S1**

Characterization of FXS HESC lines: (A) Expression of *OCT4*, *NANOG*, *SOX2* and *REX1*, by RT-PCR in all newly established FXS HESC lines. (B) Staining for OCT4, TRA-1-60 and ALKALINE PHOSPHATASE activity. Scale bars stand for 200 $\mu$ m. (C) RT-PCR demonstrating up-regulation of *ALBUMIN*, *PAX6* and *DESMIN* gene markers, representing the three different embryonic germ layers, in fully matured embryoid bodies (EBs) and their undifferentiated cell counterparts (ES) in a representative number of FXS HESC lines. (D) Teratoma sections stained by H&E in a representative number of FXS HESC lines. Scale bars stand for 130  $\mu$ m.

### **Fig. S2**

Analysis of X-inactivation and *FMR1* methylation in FXS HESCs and primary cells of patients: (A) Skewed X inactivation (Xi) was confirmed using an established methylation-sensitive quantitative assay, as described in Kiedrowski et al., 2011. The test is based on digestion with a methylation-sensitive restriction enzyme followed by PCR amplification of a short fragment within the X-linked *ANDROGEN RECEPTOR* gene. The fragment includes a highly polymorphic region (CAG repeat) and several sites that are liable to differential methylation by Xi. While the highly polymorphic CAG repeat is used to distinguish maternal from paternal inherited X-chromosomes, the methylation-sensitive sites allow selective amplification of alleles that are exclusively present on the inactive X chromosome regardless of parental origin. Accordingly, by comparing the relative amount and fragment size of digested and undigested PCR products using capillary electrophoresis, a skewed bias from the expected 50:50 ratio between the inactive maternal or paternal X chromosomes is readily identified. Paternal DNA was used to confirm full digestion and to distinguish the maternal (carrying the *FMR1* CGG expansion) from the paternal inherited X chromosome. A representative Xi assay on SZ-FX3 is depicted in which complete X-inactivation of the maternal X chromosome is evident from the detection of a single PCR product of 234bp following digestion with a methylation-sensitive enzyme. For primer set see Table S4. (B) Bisulfite pyrosequencing results in primary cultures (lymphocytes (GM\_09237) and fibroblasts (GM\_04024, GM\_05131, GM\_07730 and GM\_09497) of 5 different patients. (C) *FMR1* methylation levels by bisulfite pyrosequencing in 3 XY FXS HESC lines along with time in culture. Bisulfite pyrosequencing results for each cell line at two different passages demonstrates that methylation levels remain stable along with time in culture. (D) Analysis

of *FMR1* methylation levels in XY WT and FXS HESC lines by bisulfite colony sequencing. Single molecule bisulfite sequencing was carried out at CpG sites located 5' (230bp, 22 CpG sites) and 3' (173bp, 10 CpG sites) with respect to the CGGs. Each line represents one molecule, with methylated and unmethylated CpGs designated by black and white circles, respectively.

### Fig. S3

Characterization of FX-iPS cell clones: (A) immunostaining for OCT4 (red, merged onto Hoechst (blue)), for the cell surface marker TRA-1-60 (red, merged onto Hoechst (blue)), and for ALKALINE PHOSPHATASE activity (AP). Scale bars stand for 130  $\mu$ m. (B) Expression of the undifferentiated cell specific markers *OCT4*, *NANOG*, *SOX2* and *REX1* in four FX-iPS cell line clones (FX-iPS-2, -3, -17 and -35). (C) RT-PCR demonstrating up-regulation of *ALBUMIN*, *PAX6* and *DESMIN* gene markers, representing the three different embryonic germ layers (endoderm, ectoderm and mesoderm, respectively), in fully matured embryoid bodies (EBs) as compared with their undifferentiated cell counterparts (iPS) in FX-iPS-2,-3,-17 and -35. (D) Chromosome analysis, by Giemsa staining, carried out on metaphase chromosomes of all four FX-iPS clones. (E) Bisulfite single molecule sequencing 5' to the repeats demonstrates 77% methylation levels in parental FXS fibroblasts (for methylation levels by bisulfite pyrosequencing 5' and 3' to the CGGs see Fig S2B). (F) Average values of *FMR1* mRNA levels in four FX-iPS clones as determined by 3 independent RT-qPCR experiments of a given culture. (G) Bisulfite pyrosequencing analysis for methylation levels 5' and 3' to the CGGs in the FX-iPS clones.

### **TABLE LEGENDS**

Tables S1-S4. Primer sets, annealing temperatures and product sizes for qRT-PCR reactions (table S1), bisulfite analysis (table S2), ChIP experiments (table S4) and X-inactivation test (table S4).

Table S1: Primer Sets for RT-PCR reactions:

|                         | 5' Primer (sequence 5'-3') | 3' Primer (sequence 5'-3') | Annealing Temp °C | Product Size (bp) |
|-------------------------|----------------------------|----------------------------|-------------------|-------------------|
| <i>OCT4</i>             | GACAGGGGGGAGGGGAGGAGCTAGG  | CTTCCCTCCAACCAGTTGCCCCAAC  | 60                | 144               |
| <i>NANOG</i>            | CAGCCCCGATTCTTCCACCAGTCCC  | CGGAGATTCCCAGTCGGGTTCCACC  | 55                | 342, 390          |
| <i>REX1</i>             | CAGATCCTAAACAGCTCGCAGAAT   | GCGTACGCAAATTAAGTCCAGA     | 60                | 306               |
| <i>SOX2</i>             | GGGAAATGGGAGGGGTGCAAAGAGG  | TTGCCGTGAGTGGATGGGATTGGTG  | 55                | 151               |
| <i>GAPDH</i>            | CCACTCCTCCACCTTTGAC        | ACCCTGTTGCTGTAGCCA         | 62                | 102               |
| <i>ALBUMIN</i>          | TGGCACAATGAAGTGGGTAA       | TCAAATGGACTGCTGAAGA        | 56                | 131, 189          |
| <i>PAX6</i>             | ACCCATTATCCAGATGTGTTTG     | ATGGTGAAGCTGGGCATAG        | 56                | 317               |
| <i>DESMIN</i>           | TCGGTATTCCATCATCTCCTG      | GGTGGAGGTGCTCACTAACCC      | 56                | 481               |
| <i>FMR1 (Exons 2-4)</i> | CATGAAGATTCAATAACAGTTGC    | CACCTTAGCTAACCACCAACAG     | 56                | 183               |

Table S2: Primer Sets for Bisulfite Analysis:

|                                             | 5' Primer (sequence 5'-3')  | 3' primer (sequence 5'-3') | Annealing Temp °C | Product Size (bp) |
|---------------------------------------------|-----------------------------|----------------------------|-------------------|-------------------|
| <i>FMR1</i> 5' (colony and pyro-bisulfite)  | * TTGAGTGTATTTTTGTAGAAATGGG | CCTCTCTCTTCAAATAACCTAAAAA  | 56-59             | 191               |
| <i>FMR1</i> 3' - colony bisulfite           | GGTATTTGGTTTTAGGGTAGGTTT    | TTCCAACAAACCCCAAAT         | 56-58             | 173               |
| <i>FMR1</i> 3' - pyro bisulfite             | AGAGGGGTTTTTAATAGGTTTTAAGTT | *CTTCCCTCCCTTTTCTTCTTAAT   | 59                | 143               |
| <i>FMR1</i> 5' (sequencing primer for pyro) |                             | CTCTTCAAATAACCTAAAAAC      |                   |                   |
| <i>FMR1</i> 3' (sequencing primer for pyro) | GAGAGTGTTTTGGTATTTAGG       |                            |                   |                   |

\*Biotinilated primer for pyrosequencing

Table S3: Primer Sets for ChIP Analysis:

|                                  | 5' Primer (sequence 5'-3') | 3' Primer (sequence 5'-3')   | Annealing Temp °C | Product Size (bp) |
|----------------------------------|----------------------------|------------------------------|-------------------|-------------------|
| <i>HOXA9</i>                     | CTCAGGAGCCTCGTGTCTTT       | GTGACCAGGTGGAGGTGTGT         | 60                | 82                |
| <i>CRYSTALIN</i>                 | CCGTGGTACCAAAGCTGA         | AGCCGGCTGGGGTAGAAG           | 58-62             | 85                |
| <i>APRT</i>                      | GCCTTGACTCGCACTTTTGT       | TAGGCGCCATCGATTTTAAG         | 60                | 85                |
| <i>CTCF +1000</i>                | CACCAAATCACAATGGCAAC       | GGCCATGTTAGGGTCTTCT          | 60                | 98                |
| <i>CTCF -800</i>                 | GACAGGACGCATGACTGCTA       | GCACTTGAGGTTCAATTTCTGC       | 60                | 89                |
| <i>CTCF +10kb</i>                | TTTGTGTGTGTGGCAATGAA       | CTCAGTATGCCTGGGTCACA         | 60                | 162               |
| <i>CTCF +300</i>                 | GCTAGCAGGGCTGAAGAGAA       | CTGCCCTAGAGCCAAGTACC         | 60                | 91                |
| <i>CTCF -300 (FMR1 promoter)</i> | AACTGGGATAACCGGATGCAT      | GGCCAGAACGCCATTTTC           | 63                | 72                |
| <i>DMPK</i>                      | CTGCCAGTTCACAACCGCTCCGAG   | GCAGCATTCCCGGCTACAAGGACCCTTC | 73-76             | 147               |
| <i>FXN</i>                       | TCCTGAGGTCTAACCTCTAGCTGC   | CGAGAGTCCACATGCTGCTCC        | 63-66             | 131               |

Table S4: Primer Sets for X-inactivation test (as described by (Kiedrowski et al., 2011))

|                               | 5' Primer (sequence 5'-3') | 3' Primer (sequence 5'-3') | Annealing Temp °C | Product Size (bp) |
|-------------------------------|----------------------------|----------------------------|-------------------|-------------------|
| <i>ANDROGEN RECEPTOR (AD)</i> | HEX-GTGC GCGAAGTGATCCAGAA  | CCAGGACCAGGTAGCCTGTG       | 59                | 244               |
